# Supplementary material
Source: PubMed Central journal article supplement (PMC1459105)
Supplement: NIHMS5717-supplement-disclosure.pdf [file NIHMS5717-supplement-disclosure.pdf]

According to the IOVS policy, the uploaded paper should be made available free on NIH web site after 6 months from the original publication date (October 2005).

Sincerely,

A handwritten signature in black ink, appearing to read "A. Ljubimov". The signature is written in a cursive style with a large initial "A".

Alexander V. Ljubimov, Ph.D.  
Professor, UCLA School of Medicine  
Director, Ophthalmology Research Laboratories  
Cedars-Sinai Medical Center  
8700 Beverly Boulevard, D-2025  
Los Angeles, CA 90048  
Tel. (310) 423-7645  
Fax (310) 423-0302  
E-mail [ljubimov@cshs.org](mailto:ljubimov@cshs.org)
